# 1 Taming the massive genome of Scots pine with PiSy50k, 2 a new genotyping array for conifer research

3 Chedly Kastally<sup>a\*</sup>, Alina K. Niskanen<sup>a\*</sup>, Annika Perry<sup>b</sup>, Sonja T. Kujala<sup>c</sup>, Komlan Avia<sup>d</sup>, Sandra  
4 Cervantes<sup>a</sup>, Matti Haapanen<sup>e</sup>, Robert Kesälahti<sup>a</sup>, Timo A. Kumpula<sup>a</sup>, Tiina M. Mattila<sup>a,f</sup>, Dario I.  
5 Ojeda<sup>a,g</sup>, Jaakko S. Tyrmi<sup>a</sup>, Witold Wachowiak<sup>h</sup>, Stephen Cavers<sup>b</sup>, Katri Kärkkäinen<sup>c</sup>, Outi  
6 Savolainen<sup>a</sup>, Tanja Pyhäjärvi<sup>a,i\*\*</sup>

7 <sup>a</sup>Department of Ecology and Genetics, University of Oulu, 90014 University of Oulu, Finland

8 <sup>b</sup>UK Centre for Ecology & Hydrology, Bush Estate, Penicuik, Midlothian, UK, EH26 0QB, UK.

9 <sup>c</sup>Natural Resources Institute Finland (Luke), Paavo Havaksen tie 3, 90570 Oulu, Finland

10 <sup>d</sup>Université de Strasbourg, INRAE, SVQV UMR-A 1131, F-68000, Colmar, France

11 <sup>e</sup>Natural Resources Institute Finland (Luke), Latokartanonkaari 9, FI-00790 Helsinki, Finland

12 <sup>f</sup>Department of Organismal Biology, EBC, Uppsala University, Uppsala, Sweden

13 <sup>g</sup>Norwegian Institute of Bioeconomy Research, Ås, Norway

14 <sup>h</sup>Institute of Environmental Biology, Faculty of Biology, Adam Mickiewicz University in Poznań,  
15 Uniwersytetu Poznańskiego 6, 61-614 Poznań, Poland

16 <sup>i</sup>Department of Forest Sciences, University of Helsinki, 00014 University of Helsinki, Finland

17 \*Contributed equally

18 \*\*Corresponding author: Tanja Pyhäjärvi, Department of Forest Sciences, University of Helsinki,  
19 FIN-00014 University of Helsinki, Finland, [tanja.pyhajarvi@helsinki.fi](mailto:tanja.pyhajarvi@helsinki.fi)

## 20 Summary

21 Scots pine (*Pinus sylvestris*) is the most widespread coniferous tree in the boreal forests of  
22 Eurasia and has major economic and ecological importance. However, its large and repetitive  
23 genome presents a challenge for conducting genome-wide analyses such as association  
24 studies and genomic selection. We present a new 50K SNP genotyping array for Scots pine  
25 research, breeding programs, and other applications. To select the SNP set, we first genotyped  
26 480 Scots pine samples on a 407 540 SNP screening array, and identified 47 712 high-quality  
27 SNPs for the final array (called 'PiSy50k'). Here, we provide details of the design and testing, as  
28 well as allele frequency estimates from the discovery panel, functional annotation, tissue-  
29 specific expression patterns, and expression level information for the SNPs or corresponding  
30 genes, when available. We validated the performance of the PiSy50k array using samples from  
31 breeding populations from Finland and Scotland. Overall, 39 678 (83.2%) SNPs showed low  
32 error rates (mean = 0.92%). Relatedness estimates based on array genotypes were consistent  
33 with the expected pedigrees, and the amount of Mendelian error was negligible. In addition,  
34 array genotypes successfully discriminate Scots pine populations from different geographic  
35 origins. The PiSy50k array will be a valuable tool for future genetic studies and forestry  
36 applications.

## 37 Significance statement

38 Scots pine is an evolutionary, economically and ecologically impressive coniferous species but  
39 its gigantic genome has limited studying e.g. the genetic basis of its functional trait variation. We  
40 have developed a genotyping array that facilitates Scots pine genetic research and linking its  
41 trait variation to genetic polymorphisms and gene expression levels across the genome.

## 42 Introduction

43 Scots pine (*Pinus sylvestris*) is one of the world's most widely distributed conifers (Durrant *et al.*,  
44 2016) and is dominant in forests across 145 million hectares in Northern Eurasia (Mason and  
45 Aía, 2000; Mullin *et al.*, 2011; Pyhäjärvi *et al.*, 2020). The species is an important source of  
46 timber and other wood-based products (CABI, 2013) and boreal forests, of which Scots pine is  
47 an essential part, are a significant carbon sink (Pan *et al.*, 2011). In addition to traditional timber,  
48 pulp, paper, and energy production, more diverse uses for Scots pine biomass are currently  
49 being developed (e.g., Agbor *et al.*, 2011; Rusanen *et al.*, 2019). The combination of large  
50 biomass volumes, the species capability of adapting to varying marginal environments (Durrant  
51 *et al.*, 2016), and modern genomic tools provide new possibilities for improving the desired  
52 economic and ecological properties.

53 Breeding activities of Scots pine are centralized in Fennoscandia and the Baltic region, Sweden  
54 and Finland having the most advanced breeding programs (Haapanen *et al.*, 2015). A first cycle  
55 of selection and breeding was completed in the UK in the late 20<sup>th</sup> century (Lee, 2002), and  
56 there is currently substantial interest in further improvement of the species, to reduce national  
57 dependency on exotics. The genetic gains from breeding are delivered by seed from seed  
58 orchards, comprising copies of field-tested plus trees (outstanding selections from wild stands).  
59 Orchard-reproduced stock has been predicted to yield 20-25% improvement in per unit area  
60 wood production above unimproved seed lots (Rosvall *et al.*, 2001, Haapanen *et al.*, 2016;  
61 Jansson *et al.*, 2017). Forest tree breeding programs traditionally operate on large numbers of  
62 individuals. Cost-effective genotyping platforms are therefore essential in incorporating  
63 genomics to tree breeding schemes in the extent that is now true for cattle and crop breeding  
64 (Grattapaglia *et al.*, 2018, Meuwissen *et al.*, 2016; Voss-Fels *et al.*, 2019).

65 Genotyping arrays are efficient and easy in comparison to other cost efficient sequencing  
66 methods such as genotyping-by-sequencing (Pavan *et al.*, 2020). They are more reproducible  
67 across studies, have less missing data and, importantly, require less bioinformatic pre-  
68 processing (e.g., Darrier *et al.*, 2019). For forest tree species, SNP arrays are available for  
69 walnut (Marrano *et al.*, 2019), Norway spruce (Bernhardsson *et al.*, 2020) and several eucalypt  
70 species (Silva-Junior *et al.*, 2015). They have been used to build linkage maps (Silva-Junior and  
71 Grattapaglia, 2015), develop genomic selection (GS) models (Tan *et al.*, 2017) and in genome-  
72 wide association studies (GWAS) (Bernard *et al.*, 2020).

73 We foresee four primary applications for a new Scots pine SNP genotyping array:

74 1) Genomic selection

75 Genomic selection aims to predict the breeding value of an individual based on its genotypes,  
76 where markers are assumed to be in linkage disequilibrium (LD) with the causal variation  
77 (Meuwissen *et al.*, 2001). In a set of individuals with both genotype and phenotype data (training  
78 population), genomic prediction models are first generated and tested, leading to a prediction  
79 equation. Genomic estimated breeding values (GEBV) can then be calculated from this  
80 equation for individuals with genotype data only (e.g., Wray *et al.*, 2019). GS in trees shows  
81 promising results (Isik 2014) and good predictive ability has been achieved with a few thousand  
82 of SNPs (e.g., Bartholomé *et al.*, 2016; Calleja-Rodriguez *et al.*, 2020; Cappa *et al.*, 2019; Chen  
83 *et al.*, 2018; Grattapaglia *et al.*, 2018; Lenz *et al.*, 2017; Resende *et al.*, 2012; but see  
84 Thistlethwaite *et al.*, 2020).

85 GS has potential to increase genetic gains per unit of time when the breeding cycle can be  
86 shortened, i.e. when reproductive maturity is reached soon after prediction of GEBV. There are  
87 significant biological constraints to achieve this in Scots pine that reaches sexual maturity at 8-  
88 20 years of age (Sarvas 1964). Nevertheless, genomic markers can provide other benefits by

89 reducing the phenotyping costs and achieving higher selection intensities in situations when a  
90 large number of selection candidates are more easily genotyped than phenotyped (Calleja-  
91 Rodriguez *et al.*, 2020; Grattapaglia *et al.*, 2018; Voss-Fels *et al.*, 2019). The operational  
92 viability of such measures is obviously dependent on the costs of genotyping.

### 93 2) Pedigree construction

94 Genotyping data can be used to confirm and reconstruct pedigrees, identify labeling and  
95 grafting errors, and estimate genomic relatedness among individuals. Realized genomic  
96 relationships are potentially very useful for Scots pine breeding programs, as they allow more  
97 accurate genomic prediction of breeding values. Genomic relationships can also help to bridge  
98 unconnected progeny-testing series in a multi-environment genetic evaluation. Pedigree  
99 reconstruction and parentage analysis using markers also opens opportunities for implementing  
100 less costly breeding strategies, such as polymix breeding (Isik 2014).

### 101 3) Genome-wide association studies

102 Many of the most valued characteristics of Scots pine and other conifers are complex traits,  
103 controlled by many genes. GWAS offers a way to detect the loci responsible governing the  
104 variation, improving our understanding of the genetic architecture and biological mechanisms  
105 behind these traits (Burghardt *et al.*, 2017; González-Martínez *et al.*, 2007 ; Neale and  
106 Savolainen, 2004; Yeaman *et al.*, 2016). Large sample sizes are crucial for detecting the  
107 associations, since polygenic traits are mostly controlled by numerous small effect  
108 polymorphisms (Tam *et al.*, 2019; Yang *et al.*, 2010). A genome-wide SNP array is a convenient  
109 tool for quickly genotyping many samples. Use of a common genotyping platform will allow for  
110 comparison across studies.

### 111 4) Genetic mapping

112 High resolution genetic maps inform about the linkage relationships. They are important tools in  
113 quantitative trait locus mapping (Lander and Thompson 1990). Combined with physical maps or  
114 partial genomic information, they allow analysing of the recombination rate landscape of the  
115 genome. To achieve high resolution, large numbers of progeny need to be genotyped, for which  
116 SNP arrays are a cost efficient and powerful solution. When SNPs are anchored to scaffolds of  
117 a genome assembly, maps derived from SNP array genotyping can be used to improve the  
118 scaffolding of reference genomes, by linking together or re-ordering contigs (Fierst, 2015).

119 In addition, other potential applications for a SNP genotyping array include monitoring genetic  
120 diversity, tracing geographic origin, estimating population structure, demographic inference,  
121 identifying segregation distortion and identifying large structural variants.

122 SNP arrays are valuable universal tools for genetic fingerprinting and evaluation of diversity, but  
123 they also have limitations. For instance, SNPs are typically accumulated close to or within  
124 coding regions, because data are easier to obtain during SNP discovery using RNA-seq or  
125 exome-targeted approaches than with whole genome sequences. Further, coding regions are  
126 often of high interest and favored in array design. Also, as arrays only score preassigned SNPs  
127 with a minimum minor allele frequency (MAF) threshold often applied, there is always an  
128 ascertainment bias. This bias affects analyses performed on new individuals using the same set  
129 of markers in two ways (McTavish and Hillis, 2015). First, loci with rare alleles in the discovery  
130 population will not be scored. This may cause a bias in diversity estimation in favor of those with  
131 common alleles. Second, at the population level, allele frequencies, and thus diversity, in  
132 samples genetically close to the discovery panel will be biased upward compared to samples  
133 from a distant lineage. Ascertainment bias thus is especially problematic for inferences requiring  
134 information on rare alleles and not suitable for identifying new genetic variants. However, in  
135 many analyses, the ascertainment bias can be taken into account if the original SNP discovery  
136 panel and the array design is known (Clark *et al.*, 2005).

137 Here, we present the Axiom PiSy50k (Thermo Fisher Scientific), a new genotyping array for  
138 Scots pine. We describe the different SNP sources and discovery panels and the selection  
139 process used during the array design. The final array combines a set of high-performing SNPs  
140 from a previously developed Axiom\_PineGAP trans-specific SNP array of *Pinus* (Perry *et al.*,  
141 2020) and a new set of curated SNPs originating from exome capture, RNA-seq, PacBio and  
142 candidate gene studies (Table 1). We provide a detailed description of SNP discovery,  
143 screening, filtering, evaluation of ascertainment bias, error rates, and the metadata we collected  
144 during the design, such as gene expression and copy-number variation. We also explore the  
145 array's capability to discriminate populations and reconstruct pedigrees.

## 146 Results and discussion

### 147 Array design

148 SNP choice and array design had four main stages: collection, filtering, *in silico* evaluation and  
149 screening array evaluation (Figure 1). We first collected SNPs from eight data sets that differed  
150 in sample size, sampling design, source material (RNA or DNA, tissue) and sequencing  
151 technology (Sanger sequencing, PacBio, Illumina-seq). We filtered these initial data, tailoring  
152 our approach to each data source's specific characteristics. We removed markers likely to be in  
153 paralogous areas of the genome. Paralogy is a common problem for conifer species, which  
154 have large genomes with a lot of repetitive elements (Neale *et al.*, 2014). Partly, this was done  
155 by checking haplotypes from seed megagametophyte tissue, where observed heterozygosity  
156 indicates false SNPs generated by paralogy. After the initial filtering, Thermo Fisher Scientific  
157 conducted an *in silico* evaluation of 1.3 million SNPs and from these, we selected 407 540  
158 SNPs of high interest and strong predicted performance.



## 159 Performance of the screening array

160 We evaluated the performance of the screening array by genotyping a natural population  
161 sample of 470 trees, six megagametophytes and four diploid embryos from full-sib crosses, all  
162 from Finland. SNPs were assigned to six classes: Poly High Resolution (PHR, three well-  
163 separated genotypes/clusters), No Minor Homozygote (NMH, two well-separated genotypes  
164 clusters, homozygous and heterozygous), Mono High Resolution (MHR, one homozygous  
165 genotype cluster), Call Rate Below Threshold (CRBT), Off-Target Variant (OTV, more than  
166 three clusters) and Others. When choosing SNPs for the PiSy50k array based on the screening  
167 array, we considered conversion types PHR, NMH and MHR as successful. Of 407 540 SNPs in  
168 the screening array, 245 149 (60.2%) converted successfully and 157 325 (38.6%) were  
169 polymorphic (Table S1, Figure 2). The success rate varied among sources from 10% to 50%,  
170 with lowest and highest rates in the LUKE candidate and UOULU candidate derived SNPs  
171 respectively (Table S1, Figure 2). The latter set had already gone through several rounds of  
172 verification and thus its higher conversion rate was not surprising. The genotyping success rate  
173 at sample level was high; 476 (99%) samples had a call rate above the 97% threshold in the  
174 conversion classes PHR, NMH, and MHR.

175 To assess the effects of ascertainment bias throughout the PiSy50k design, we evaluated its  
176 effects on the screening array by investigating the minor allele frequency (MAF) distribution and  
177 the genetic structure in the sample. The MAF distribution of the screening array is characterized  
178 by a deficit of intermediate frequency alleles (MAF values between 0.15 and 0.5) compared to  
179 the distribution expected based on the standard neutral model (SNM) (Figure 3A). This is not  
180 surprising, as previous studies on Scots pine's genetic diversity across Europe have  
181 demonstrated an overall deficit of intermediate alleles and excess of rare alleles in natural  
182 populations of this species compared to the SNM (Tyrmi *et al.*, 2020; Pyhäjärvi *et al.*, 2020 and

183 references therein). However, the pattern of rare alleles in the screening set differs from the one  
184 in earlier studies. We observed an excess of rare allele classes (MAF between 0.007 and 0.15,  
185 Figure S1), but a deficit in the extremely rare classes (MAF below 0.007, Figure S1), as  
186 expected from ascertainment bias.

187 In addition, ascertainment bias influenced the estimates of genetic structure among samples.  
188 Principal component (PC) analyses of the screening array genotypes of UOULU RNAseq and  
189 UOULU exomeFEB2019 sets clearly separate trees included in the discovery panel from the  
190 rest of the samples (Figure S2 a and c). The ascertainment bias was more subtle in the other  
191 sources, even when samples from the discovery panel were genotyped (Figure S2 e). This  
192 difference was due to the larger size of the other discovery panels (Table 1). The effect of  
193 ascertainment bias was particularly severe when the exact discovery panel samples or their  
194 close relatives were included (Figure S2 a and c). For most applications and datasets not  
195 related to the discovery panels, these effects on genetic structure are unlikely to be so extreme,  
196 but we recommend that users of the array carefully consider sample origin when performing  
197 analyses.

198 Finally, from the remaining 75 629 SNPs, we excluded SNPs with heterozygous calls in  
199 megagametophyte haploid samples (but allowing one error in SNPs from three high priority  
200 sources, see Table 1) or with more than one Mendelian error. We also pruned SNPs in high LD  
201 ( $r^2 > 0.9$ ), keeping the SNPs with the higher minor allele frequency (MAF) from each such pair.  
202 From the remaining loci, we first retained all SNPs from high priority sources and favored SNPs  
203 with higher MAF in the remaining set. SNPs in a highly outcrossing wind pollinated natural  
204 population of Scots pine are expected to be in Hardy-Weinberg (HW) equilibrium and we used  
205 deviation from HW ( $p$ -values  $< 0.001$ ) to identify and filter out potentially paralogous and other  
206 error prone SNPs. As expected, the markers selected for the PiSy50k array deviated less from  
207 the HW expectations and showed less extreme heterozygosities compared to all screening

208 array markers before selection (Figure S3). The final PiSy50k array includes 47 712 SNPs.

## 209 Performance of the PiSy50k array

210 The 47 712 SNPs in the final PiSy50k array were in 31 657 contigs (average of 1.51 SNPs per  
211 contig). Of the eight data sources, markers from RNA-seq origin were the most prevalent (44%;  
212 Table S2). The majority of markers have been used in previous studies and come associated  
213 with various information depending on the source, including functional annotation, gene  
214 expression at the tissue level, and allele frequency estimates in up to 20 European populations  
215 (Supporting Data S1).

216 Altogether, 1 619 markers derived from ProCoGen haploid (1 544) and diploid sources (75)  
217 were located on one of the 4 226 scaffolds mapped on *P. taeda* linkage map (Westbrook *et al.*,  
218 2015; Figure 4, Table S3). There was an average of 134 SNPs per linkage group (LG) and they  
219 were homogeneously distributed among LGs. Even though the majority of SNPs do not have a  
220 known position on the map yet, the quick genotyping of large numbers of progeny with the  
221 PiSy50k array could be used to improve the genetic map of Scots pine and help anchor  
222 genomic reads, scaffolds and SNPs at the chromosome scale in the future.

223 We evaluated the performance of the PiSy50k array by genotyping 2 688 samples from Finland  
224 (2178, including 14 controls), Scotland (496), Australia (3), and Estonia (11). Of these, 2 308  
225 samples had call rates above 97% (85.9% of samples), the recommended threshold for Axiom  
226 genotyping arrays. In total, 40 405 (84.69 %) markers were successfully converted of which 39  
227 678 markers were polymorphic (Table S4).

228 Of the 21 control samples, three needle and six megagametophyte samples passed the 97%  
229 CR threshold (Table S5). Of the six megagametophyte samples, one replicated pair was  
230 recovered. Based on the five control samples retained (three needles and one

231 megagametophyte pair), the error rates were relatively low (mean 0.83%). The error rate in the  
232 subset of SNPs shared with the Axiom\_PineGAP suggests a similar, or slightly lower, error rate  
233 in the PiSy50k (mean 0.52% compared to 0.64% in the Axiom\_PineGAP). Overall, these values  
234 are close to those obtained in other arrays, e.g. 0.8% in the walnut genotyping array (Marrano  
235 *et al.*, 2019), 0.1% in Affymetrix GeneChip Human mapping 50k Array (Saunders *et al.*, 2007),  
236 or ranging between 0.03% and 0.05% in the Axiom Apple480K genotyping array (Bianco *et al.*,  
237 2016).

238 Of the 930 markers with errors among pairs (including both needle and megagametophyte  
239 controls), the majority (N = 916) were not shared among controls. This suggests that the error  
240 probably occurred during the genotype call for a single sample only, as opposed to the marker  
241 itself being unreliable. There are 14 markers for which errors were observed among both  
242 megagametophyte and needle controls and they are indicated in Supporting Data S2.

243 Comparison of markers shared between the PiSy50k and Axiom\_PineGAP arrays (N = 7592)  
244 using the needle control present on both arrays also showed low error rates (mean 0.55%,  
245 Table S5) indicating cross-array reproducibility, which allows data obtained by the two arrays to  
246 be combined.

247 To confirm that the variants at the selected SNPs in the PiSy50k array are indeed allelic (not  
248 paralog), we assessed the heterozygosity levels of the megagametophyte samples. The two  
249 megagametophyte replicates have very low heterozygosity levels (mean 0.89%) compared to  
250 the needle replicates (mean 29.30%), suggesting a low level of errors due to paralogy. Of the 40  
251 405 converted markers, 38 906 were homozygous in both replicates, 1 060 were 'no call' in at  
252 least one replicate, 165 were heterozygous in both replicates and 274 were homozygous in one  
253 replicate and heterozygous in the other. The SNPs that were heterozygous in the  
254 megagametophyte samples are indicated in Supporting Data S2.

255 To evaluate the potential of the PiSy50k array for pedigree reconstruction and assess the  
256 proportion of Mendelian errors in the array, we analyzed the pairwise relatedness of the full-sib  
257 progeny and their parents in a subset of 135 trios across 10 families of our sample. By plotting  
258 the kinship coefficient ( $K$ , (Manichaikul *et al.*, 2010)) against the proportion of sites where  
259 individuals share no allele (IBS0), we identified four distinct groups (Figure 5a): (1) known  
260 parent-offspring pairs (mean  $\pm$  standard deviations:  $K = 0.245 \pm 0.004$ ,  $IBS0 = 0.001 \pm 2e-$   
261  $04$ ), (2) full-sibs ( $K = 0.246 \pm 0.027$ ,  $IBS0 = 0.015 \pm 4e-03$ ), (3) half-sibs ( $K = 0.120 \pm 0.018$ ,  
262  $IBS0 = 0.030 \pm 4e-03$ ), and finally (4) the remaining unrelated pairs ( $K = -0.002 \pm 0.009$ ;  $IBS0$   
263  $= 0.059 \pm 2e-03$ ). We separated parent-offspring pairs from full-sibs, which have expected  $K$   
264 values close to 0.25, using the IBS0 statistic (equal or close to 0 between a parent and an  
265 offspring but with higher values between siblings (Manichaikul *et al.*, 2010)). Within each family,  
266 the  $K$  estimates were around the expected value of 0.25, while between families it was close to  
267 0, except for progeny pairs between families 5 and 31, and families 14 and 20, which shared a  
268 common parent and had a  $K$  estimate around 0.125, as expected for half-sibs (Figure 5). The  
269 pedigree relationships identified with PiSy50k matched those expected from the crossing  
270 design, demonstrating the array's power to resolve relatedness structure and reconstruct  
271 pedigrees, a critical feature for a multitude of applications in tree breeding and genetics: GWAS,  
272 GS, breeding program management and seed production.

273 To further assess the error rate in the PiSy50k data, we evaluated the number of Mendelian  
274 errors (ME) within each family. We examined all 40 405 SNPs in 135 trios and identified 16 040  
275 errors across 5 837 loci (mean error rate per locus = 0.29%; Figure S4a). More than 98% of all  
276 SNPs had a ME below 5%. Across families, we identified an average of 1 604 errors per family,  
277 majority in different SNPs across families (Figure S4b: 4277 SNPs with an error only in a single  
278 family and 1110 in at least two). These values are in line with the ME measured in other arrays  
279 (Bernhardsson *et al.*, 2020; Silva-Junior *et al.*, 2015).

## 280 Genetic diversity

281 To explore the power of genotypes from the PiSy50k array to discriminate trees from different  
282 geographic origins, we ran a principal component analysis (PCA) using a subset of 120 samples  
283 from different localities in Scotland and Finland (Figure 6). The first two PCs separated two main  
284 groups consistent with the two countries of origin. We then ran PCAs using only samples from  
285 each country. Although no distinct groups appeared in those analyses, some differentiation was  
286 found between samples from different geographic origins in Scotland (Figure 6b) – a level of  
287 geographic resolution not previously possible. In the Finnish subset, variation was more  
288 homogeneous with less geographic structure (Figure 6c), although samples from Northern  
289 origins were located slightly apart from samples from Southern and Central origins.

290 To assess the effects of ascertainment bias on the MAF distribution in the PiSy50k array, we  
291 compared the frequency distributions obtained from the array to a previously published exome  
292 capture dataset (Tyrmí *et al.*, 2020) (Figure 3B). We observed a similar but stronger effect of  
293 ascertainment on the MAF estimated with the PiSy50k array genotyping results than with the  
294 screening array results. Indeed, in the PiSy50k results, the distribution reaches a maximum at  
295 frequency 0.13, with decreasing frequencies of lower MAF values, as opposed to the screening  
296 array where the peak is at the lowest allele frequency class. This could be explained by the  
297 more stringent filtering of SNPs with low allele frequencies when selecting markers for the final  
298 PiSy50k set, whereas there was no intentional allele frequency filtering from the source data to  
299 the screening set. In addition, the discovery process naturally has an inherent filter for allele  
300 frequency, which is the sample size of the discovery panel.

301 In summary, PiSy50k is a novel genotyping tool for Scots pine, an economically important and  
302 widely distributed conifer. It greatly improves the genotyping capacity for the species, which will  
303 facilitate wide application of modern breeding tools and supports the development of a new,  
304 forest-based bioeconomy. The metadata provided connects the genotyping data to functional

305 properties via annotations and tissue-specific expression patterns. Low error rates indicate high  
306 reproducibility even across the previous Scots pine array Axiom\_PineGAP (Perry *et al.*, 2020),  
307 hence new datasets will be back-compatible and all new work will add value to our knowledge of  
308 the species.

## 309 Experimental procedure

### 310 Selection of SNPs for initial screening

#### 311 *ProCoGen haploid and diploid sets.*

312 The ProCoGen haploid and diploid sets were generated with two exome-capture experiments  
313 both based on the same bait set used by Tyrmi *et al.* (2020). A total of 177 trees collected  
314 across Europe, from Spain to northern Finland, were genotyped using DNA extracted from  
315 megagametophyte tissue (haploid set, 109 samples, 12 populations) or needles (diploid set, 68  
316 samples, 8 populations). Bait design, DNA extraction, library preparation, and sequencing steps  
317 followed the procedure described in (Tyrmi *et al.*, 2020). We processed the sequences  
318 generated to identify SNPs following the same method described in Tyrmi *et al.* (2020) for the  
319 haploid set, but applied a few adjustments for the diploid set: we used BWA (Li, 2013) for  
320 mapping reads and used samtools v0.9 (command *mpileup*, default parameters) (Li *et al.*, 2009)  
321 for variant calling. To filter potential paralogs, we removed loci with heterozygous calls in the  
322 haploid set or significantly departing from the HWE in the diploid set (PLINK v1.90b5.2 (Chang  
323 *et al.*, 2015) command *--hardy*, at  $\alpha = 0.05$ ). During this procedure, we excluded one  
324 haploid sample with an exceptionally high proportion of heterozygous calls. Finally, we excluded  
325 all SNPs within 50 bp distance of these markers. We retained 248 591 and 32 649 SNPs in the  
326 haploid and diploid sets, respectively.

### 327 *UOULU exomeFEB2019*

328 We used 95 504 SNPs identified in exome capture of a family originating from Punkaharju ISS,  
329 in southeast Finland: a cross between Maternal tree 463 and paternal tree 485 (Kesälahti *et al.*,  
330 In Prep). The material sampled consisted of: needles of both parental trees, one  
331 megagametophyte of the paternal tree, two megagametophyte of the maternal tree from open-  
332 pollinated seeds, and, from two seeds of the cross progeny, two embryos and a  
333 megagametophyte were sampled. We excluded positions with depth below 4 per genotype. We  
334 removed twenty-five base pairs both upstream and downstream from each heterozygous site  
335 found in haploid megagametophyte as potential areas with paralog or mapping issues.

### 336 *UOULU RNA-seq*

337 The UOULU RNA-seq set refers to markers derived from RNA-seq data (Ojeda *et al.*, 2019)  
338 originating from five tissues (needle, phloem, vegetative bud, embryo and megagametophyte) of  
339 six unrelated individuals of Scots pine (but 18 haploid genomes when accounting for diploidy  
340 and paternal contribution in embryos) collected from Punkaharju ISS. We considered 1 349 291  
341 SNPs obtained by mapping RNA-seq reads to the Scots pine reference transcriptome  
342 ([https://a3s.fi/pinus\\_sylvestris\\_transcriptome\\_public\\_data/Trinity\\_CD-HIT.fa](https://a3s.fi/pinus_sylvestris_transcriptome_public_data/Trinity_CD-HIT.fa)). From this initial  
343 set, we first excluded markers identified in contigs associated with potential contaminants (fungi  
344 or microbes) (Cervantes *et al.*; Ojeda *et al.*, 2019)  
345 ([https://a3s.fi/pinus\\_sylvestris\\_transcriptome\\_public\\_data/Trinity\\_guided\\_gene\\_level\\_info.txt](https://a3s.fi/pinus_sylvestris_transcriptome_public_data/Trinity_guided_gene_level_info.txt)).  
346 Second, we removed heterozygous SNPs in haploid samples. Finally, we compared the  
347 genotypes called in megagametophyte, embryo and diploid tissues collected from the same tree  
348 to identify and exclude loci with Mendelian errors. In total, we retained 736 827 SNPs.  
349 For the *UOULU RNA-seq* set, we provide information about the predicted multi-copy status,



350 orthologous genes identified in *P. taeda* (Zimin *et al.*, 2014) and *P. lambertiana* (Stevens *et al.*,  
351 2016) based on blastn results (see details in Ojeda *et al.*, 2019), and expression levels and  
352 tissue-specificity in five tissues (Cervantes *et al.*). This information is available in Supporting  
353 Data S1.

#### 354 *UOULU candidate*

355 The UOULU candidate set contains SNPs reported in multiple publications and genetic  
356 databases on various candidate genes of Scots pine. This set includes SNP markers used in  
357 Kujala *et al.* (2017), and additional SNPs from phenology related genes (Kujala and Savolainen  
358 2012; Palme *et al.*, 2008; Pyhäjärvi *et al.*, 2007, Wachowiak *et al.*, 2009), stress and phenology  
359 related genes (Avia *et al.*, 2014), polyamine genes (Vuosku *et al.*, 2018, 2019), genes from  
360 comparative resequencing projects (Wegrzyn *et al.*, 2008; Grivet *et al.*, 2017), and markers  
361 identified in sequences from the Evoltree EST database ([www.evoltree.eu](http://www.evoltree.eu)). Additionally, for a  
362 subset of those markers, we have collected allele frequency estimates from two genotyping  
363 assay experiments on 426 Scots pine trees (data unpublished). These SNPs, referred to as  
364 UOULU candidate VIP in the metadata, were given higher priority during the array manufacture,  
365 in both the screening and PiSy50k arrays, by increasing their probeset counts and, this way,  
366 improving their call rates during the genotyping.

#### 367 *LUKE candidate*

368 The LUKE candidate set comprises SNPs extracted from candidate genes related to phenology  
369 (e.g. Bouché *et al.*, 2016) and genes of the primary and secondary metabolism pathways active  
370 during heartwood formation (Lim *et al.*, 2016). DNA libraries targeting these candidate genes  
371 were produced from one individual of Southern Finnish origin and sequenced using a PacBio  
372 sequencer (Kujala *et al.*, in prep). We used the long PacBio sequences as a reference to map

373 short reads from exome captures of megagametophyte samples of Scots pine collected across  
374 Europe (Tyrmi *et al.*, (2020) excluding samples from Baza, Spain) with BWA mem (Li, 2013).  
375 Since a preliminary variant calling based on this initial mapping resulted in a large number of  
376 errors (heterozygous calls in haploid samples), we isolated short reads mapping to individual  
377 PacBio contigs and re-assembled them with MIRA (Chevreux, 2007) for each individual. We  
378 then aligned the resulting individual re-assemblies to each other with cap3 (Huang and Madan,  
379 1999), and called variants using bcftools (commands *mpileup* and *call*). In addition, some SNPs  
380 were identified and included solely as being polymorphic within the reference individual.

### 381 *UKCEH sets 1 and 2*

382 We used SNPs collected during the Axiom\_PineGAP (Thermo Fisher Scientific) array design  
383 (Perry *et al.*, 2020) and from the comparative transcriptomics of four pine species (*P. sylvestris*,  
384 *P. mugo*, *P. uncinata* and *P. uliginosa*) by Wachowiak *et al.* (2015). Briefly, we identified 196  
385 636 polymorphic positions from transcriptomes, candidate gene sequences and markers from  
386 previous population genetic studies on the four above mentioned pine species. From these, we  
387 retained two distinct sets: (1) UKCEH1, comprised of 20 795 successfully converted SNPs from  
388 the Axiom\_PineGAP array, and (2) UKCEH2, a set of 175 841 SNPs including 29 034 SNPs  
389 from the Axiom\_PineGAP array which were not successfully converted, 31 897 SNPs that  
390 passed the initial filtering during the design but were not included in the final array and 114 910  
391 SNPs identified by Wachowiak *et al.* (2015) which were polymorphic in Scots pine but not  
392 included in the Axiom\_PineGAP array design.

### 393 SNP scoring for inclusion in the screening array

394 For each retained site, we built 71-mer probes by extracting up to 35 bp up- and downstream  
395 from the source references. We submitted 1 317 798 probes to Microarray Research Services

396 Laboratory (Thermo Fisher Scientific), Santa Clara, US, for scoring (Table S1). During this step,  
397 probes' score were downgraded if: they contained polymorphic sites within 35 bp distance of the  
398 focal marker (interfering polymorphism), they were mapped to highly repetitive regions of the  
399 genome (using TrinityCD-HIT.fasta.gz and Pita 1.01

400 ([https://treegenesdb.org/FTP/Genomes/Pita/v1.01/genome/Pita.1\\_01.fa.gz](https://treegenesdb.org/FTP/Genomes/Pita/v1.01/genome/Pita.1_01.fa.gz)) as references for  
401 RNA and DNA based probes respectively), or were highly similar to other probes. Each marker  
402 was given a classification: 'Recommended', 'Neutral', 'Not recommended' or 'Not possible'.  
403

404 Based on Thermo Fisher Scientific's evaluation and the available metadata on each data  
405 source, we established the following priority groups (in order of priority): (1) the 20 795 high  
406 quality SNPs from the Axiom\_PineGAP array, (2) all recommended or neutral markers identified  
407 by Thermo Fisher Scientific, (3) UOULU candidate markers, (4) LUKE candidate markers, (5)  
408 from the 'not recommended' set in the ProCoGen haploid set, SNPs of high interest identified in  
409 (Tyrimi *et al.*, 2020), (6) SNPs with less than 50% of missing data in the discovery panel from the  
410 'not recommended' set in the ProCoGen sets, and finally, (7) we relaxed the filtering criterion  
411 used by Thermo Fisher Scientific and selected the best markers in the remaining set. More  
412 specifically, we relaxed the wobble count filter threshold (number of polymorphic sites on the  
413 same 71-mer) from  $< 4$  to  $< 6$ , based on the assumption that a high proportion of the variable  
414 sites are associated with rare alleles, and thus interfering polymorphism should have lower  
415 impact on the probe performance in the case of Scots pine. During the screening array  
416 manufacture, out of the 428 516 SNPs retained, a total of 407 540 markers were fitted on the  
417 array.

## 418 Screening set genotyping

419 The screening set of 407 540 SNPs was used to confirm the normal segregation of

420 polymorphism in a larger sample from a natural population, to identify potential deviations from  
421 HW equilibrium, indications of paralog mapping — such as heterozygote sites in haploid  
422 samples, deviations from Mendelian segregation, and identification of loci in strong LD with  
423 each other. To this end, we used the screening array to genotype 480 samples of Scots pine  
424 from Punkaharju ISS population, including: 470 diploid needle samples from adult trees, six  
425 haploid megagametophytes and four diploid embryos. Two families, “463 x 485” and “320 x  
426 251”, with two parents and two offspring (embryos) from each were used to estimate Mendelian  
427 error rate.

428 DNA was extracted from dry needles and fresh megagametophytes using E.Z.N.A.® SP Plant  
429 DNA Kit (Omega Bio-tek, Inc.). Genotyping and array manufacturing for the screening set was  
430 performed by Thermo Fisher Scientific at Santa Clara, US. Genotype calling was performed by  
431 Thermo Fisher Scientific (Applied Biosystems™ Axiom™ Genotyping Services) following the  
432 Axiom Best Practices Workflow (Axiom Genotyping Solution Data Analysis Guide). In short,  
433 genotype clusters were defined using samples with quality control call rate (QC CR)  $\geq 0.97$   
434 and dish quality control rate (dQC)  $\geq 0.82$ . The markers were classified into five conversion  
435 categories: PolyHighResolution (PHR), NoMinorHom (NMH), MonoHighResolution (MHR),  
436 CallRateBelowThreshold (CRBT), Off-Target Variant (OTV), and Other. We retained markers  
437 only from classes PHR and NMH with call rate (CR)  $\geq 0.97$  in the subsequent analyses of the  
438 screening array and for inclusion on the PiSy50k array.

439 During the array design of both screening and PiSy50k arrays, identical SNPs discovered  
440 independently across different sources were identified and merged. To keep track of as much  
441 information as possible for those markers, we recorded their common presence and IDs in  
442 different sources but eventually assigned a single authoritative origin.

## 443 Selection of markers for the PiSy50k array

444 For the PiSy50k array, we filtered the markers based on their performance on the screening  
445 array prioritizing markers in candidate genes of interest or markers that performed well in the  
446 Axiom\_PineGAP array (Perry *et al.*, 2020). These markers were within the Axiom Best Practices  
447 Workflow default quality thresholds (see above). For each marker with conversion type PHR or  
448 NMH, we estimated MAF and tested departure from HW equilibrium (exact test) for 466  
449 individuals, excluding the haploid megagametophyte samples, the offspring samples and four  
450 samples with QC CR < 0.97 using PLINK version 1.9 (Purcell *et al.*, 2007). We estimated the  
451 number of Mendelian errors in PLINK using the family data.

452 We excluded markers deviating from HW equilibrium ( $p < 0.001$ ) and markers with more than  
453 one Mendelian error. Markers from the candidate gene sources (LUKE candidate and UOULU  
454 candidate) were selected using a lenient inclusion threshold of MAF  $\geq 0.01$  and marker call  
455 rate  $> 0.90$ , which also included markers from the Thermo Fisher Scientific conversion type “call  
456 rate below threshold”. We filtered SNPs from the Axiom\_PineGAP array first to include markers  
457 with MAF  $\geq 0.05$ . To increase the number of well performing markers, we also included  
458 markers with MAF  $\geq 0.05$  in previously genotyped European samples (Perry *et al.* 2020).

459 To avoid markers in paralogous genomic regions, we excluded markers with heterozygous call  
460 in the haploid megagametophyte samples except in three high priority sources (UKCEH1, LUKE  
461 candidate and UOULU candidate) for which we allowed at most one, erroneous, heterozygous  
462 call per marker. We further granted 381 markers of high interest from sources UOULU  
463 candidate (335) and UOULU RNA-seq (23) a higher probeset count in the array to increase their  
464 call rate. Finally, to remove the excess from the retained set, we excluded markers from the low  
465 priority sources with lowest MAF (MAF after filtering  $\geq 0.08$ ). The final number of markers for  
466 PiSy50k was 47 712 (Figure 1). The distribution of the markers by source is shown in Table S2.

467 To inspect how SNP selection for the PiSy50k array affected HW deviation compared to the  
468 screening array on average, we plotted the observed  $p$ -alues from the exact HW tests against  
469 the expected  $p$ -values based on the null distribution in a cumulative Q-Q plot before and after  
470 SNP selection. We compared the observed  $p$ -values of 10 000 random loci against 100 samples  
471 drawn from the null distribution using HardyWeinberg package (Graffelman, 2015) in R (The R  
472 Project for Statistical Computing)(version 3.6.3). We also illustrated the distribution of genotypes  
473 with respect to HW expectations in ternary plots showing genotypes before and after the  
474 PiSy50k SNP choice.

475 To assess the effects of ascertainment bias on the screening array, we ran two analyses. First,  
476 we plotted the MAF distribution for loci with conversion types PHR or NMH (n loci without  
477 missing data = 56 693, n individuals = 466) against the expected MAF assuming a standard  
478 neutral model (Tajima, 1989). Second, we looked at the effects of ascertainment bias on the  
479 inference of genetic structure by conducting PCAs using the R package pcadapt (Privé *et al.*,  
480 2020). We performed PCAs using SNPs separately from each source and retained the results  
481 from two sets where we observed the strongest effects of ascertainment bias, from sources  
482 UOULU RNA-seq and UOULU exomeFEB2019, and one in which the effects were minimal, the  
483 ProCoGen haploid sources. To further illustrate the root cause of the observed biases, we  
484 performed those PCAs with and without the individuals present in the original discovery panel  
485 and driving the patterns observed.

## 486 Linkage map position of PiSy50k markers

487 To assess whether markers from the PiSy50k array are homogeneously distributed across all  
488 chromosomes, we positioned them on a genetic map produced for *P. taeda* by Westbrook *et al.*  
489 (2015) comprised of 12 linkage groups (LG) and to which contigs from *P. taeda* reference  
490 genome Pita v1.01 have been mapped. We included all PiSy50k SNPs previously mapped to

491 one of the contigs or scaffolds from the same reference genome (data sources ProCoGen  
492 haploid and diploid). When a given SNP was outside the aligned segment of the reference  
493 contig, we used the closest position effectively aligned on the genetic map from the same contig  
494 as a reference point to infer the position of the focal SNP on the map, assuming that the  
495 physical distances covered by single contigs from the Pita v1.01 reference genome to be  
496 negligible compared to the size of each individual LG.

## 497 PiSy50k array genotyping

498 We tested the PiSy50k array performance by genotyping 2 688 samples (across seven plates).  
499 The 2688 samples consisted of 317 Finnish plus trees, 1847 full-sib offspring from the Finnish  
500 breeding population, 489 Scottish samples, three Austrian samples, 11 Estonian samples and  
501 21 controls. The needle control was a single tree from Scotland, UK, and was included on each  
502 genotyping plate; this sample had also been genotyped on the Axiom\_PineGAP array. In  
503 addition, seven haploid megagametophyte samples were genotyped twice, such that each  
504 sample was genotyped on two different random plates. Other samples were randomized over  
505 the plates such that the different geographic locations and sample categories (plus trees and  
506 offspring) were spread on all plates to avoid plate effects that may bias genotyping results of a  
507 specific sample category.

508 The arrays were manufactured by Thermo Fisher Scientific (Waltham, MA, US) and genotyping  
509 was conducted by University of Bristol Genomics Facility (Bristol, UK). Needle samples (n = 2  
510 674, including 7 controls) were dried and stored in bags with silica gel. For megagametophyte  
511 samples (7 control samples included twice each), germination was initiated by placing the seeds  
512 on a moist filter paper inside a petri dish for 24 hours at room temperature. Seeds were then  
513 dissected under a microscope to separate megagametophyte from the embryo tissue. The DNA  
514 from Finnish and Estonian samples was extracted using E.Z.N.A.® SP Plant DNA Kit (Omega

515 Bio-tek, Inc.). DNA of Scottish needles were extracted using a Qiagen DNeasy Plant kit and  
516 checked visually on a 1 % agarose gel. DNA was quantified with a Qubit spectrophotometer.

517 We performed the genotype call using Axiom Analysis Suite (version 5.1.1.1) following the  
518 Axiom Best Practices Workflow with default parameters concordantly to the screening array  
519 genotype calling, except for the plate QC threshold for average call rate for passing samples,  
520 which we set to 0.97. We retained the markers in the PHR and NMH conversion classes for  
521 analyses.

## 522 Evaluation of the PiSy50k array performance

### 523 Error rate and heterozygosity in haploid samples

524 We genotyped 21 control samples to estimate error rates for each array: one needle and two  
525 megagametophyte controls per plate, with replicate megagametophyte pairs arranged over  
526 sequential plates. We estimated the error rates as the proportion of calls which did not match  
527 among pairs of controls across plates (excluding calls where one or both were missing). We  
528 also measured the heterozygosity in megagametophyte samples to assess probe specificity and  
529 identify putative paralogous markers in the PiSy50k array.

### 530 Pedigree inference and mendelian error rate

531 We used a subset of 153 samples from 10 crosses, including 18 parents and their 135 offspring,  
532 to estimate the coefficients of kinship ( $K$ ) and the proportion of sites where individuals share no  
533 allele (IBS0) between all pairs using converted SNPs (40 405) with KING v2.2.5 (options --  
534 related --degree 2) (Manichaikul *et al.*, 2010). We estimated the Mendelian error rate within  
535 each family independently using PLINK v1.90b5.2 (option --mendel).



## 536 Population clustering and ascertainment bias.

537 To evaluate the power of the PiSy50k in discriminating samples from different origins, we used  
538 a subset of 120 plus-tree samples: 30 samples from Scotland, grouped in four geographic  
539 areas, and 30 samples from Southern, Central and Northern Finland each. We assessed the  
540 genetic structure by performing three PCAs: using all 120 samples, the 90 Finnish samples or  
541 the 30 Scottish samples separately. We used the function *prcomp* (core R, with scaling and  
542 centering options enabled) after replacing missing data for a given genotype by the locus' allele  
543 frequency. Finally, to assess the effect of ascertainment bias on the MAF generated with  
544 PiSy50k, we compared the MAF distribution of the Finnish subset of 90 plus trees to the one  
545 obtained using exome capture data of Scots pine trees published in Tyrmi *et al.* 2020. From the  
546 published vcf file, we extracted the data of 42 megagametophyte samples from four Finnish  
547 populations (Inari, Kälviä, Kolari and Punkaharju). We then replaced genotypes with depth  
548 below 5 with missing data and kept only loci with a minimum call rate of 50%. Finally, to have  
549 comparable MAF distributions, we downsampled both distributions to a sample size of 30.

## 550 Author Contributions

551 Design of the study: AKN, AP, CK, KK, MH, OS, StC, STK, TP. Field and laboratory work: AKN,  
552 AP, SaC, STK, TAK, TP, RK, StC. Computational analyses: AKN, AP, CK, DIO, JST, KA, STK,  
553 TMM, TP, WW. Initial draft of the manuscript: AKN, CK, TP. Final manuscript: All authors.

## 554 Acknowledgements

555 This project has received funding from the European Union's Horizon 2020 research and  
556 innovation programme under grant agreement No 773383 (to UOULU, Luke, UKCEH),  
557 Academy of Finland, grants 287431, 293819 and 319313 (to T.P.), 307582 (to O.S.) and  
558 307581 (to K.K.), 309978 (to S.T.K.), and NoE EVOLTREE and Metsänjalostussäätiö (to  
559 S.T.K.), and by two grants in the UK: GAPII (NE/K012177/1), funded by NERC, and PROTREE  
560 (BB/L012243/1), funded jointly by BBSRC, DEFRA, ESRC, the Forestry Commission, NERC  
561 and the Scottish Government, under the Tree Health and Plant Biosecurity Initiative.

562 The authors wish to thank Joan Beaton and Glenn Iason (James Hutton Institute) for providing  
563 Scottish needle samples for genotyping.

## 564 Conflict of interest

565 The authors declare no conflict of interest.

## 566 Supporting information legends

567 The following material is included in the supporting information:

- 568 • Supporting Figures S1 to S4
- 569 • Supporting Tables S1 to S5
- 570 • Supporting Methods S1: “Additional steps/details in selecting markers from screening  
571 array to PiSy50k array”.
- 572 • Supporting Data S1 and S2

### 573 Legends:

574 **Figure S1.** Minor allele frequencies for the Intensive Study Site Punkaharju (southeast Finland)  
575 population (N=466) and 56 693 SNPs without missing data in the screening array. The red line  
576 illustrates the expected neutral MAF (Tajima, 1989). Note that this figure is identical to Figure 3  
577 but is represented with a logarithmic scale on both the x- and y-axes.

578 **Figure S2.** Principal component analysis on the screening array data illustrating the  
579 ascertainment bias on the observed genetic structure. (a, c, e) Analysis including samples used  
580 in SNP discovery panels of each SNP source, discovery individuals are highlighted and labelled,  
581 except in e) for clarity. (b, d, f) Analysis excluding samples used in SNP discovery. SNP  
582 sources: (a, b) UOULU RNA-seq (48 357 SNPs), (c, d) UOULU exomeFEB2019 (6 137 SNPs)  
583 and (e, f) ProCoGen haploid (23 204 SNPs).

584 **Figure S3.** Hardy-Weinberg equilibrium (HW) test results for the screening array data before

585 filtering (a,b) and for the selected set for the PiSy50k (c,d). (a,c) Q-Q plots comparing the  $p$   
586 values expected based on the null distribution against the observed  $p$  values from the exact HW  
587 tests of 10 000 random SNPs on the screening array before (a) and after (c) selecting markers  
588 for the PiSy50k array. The green line indicates the expected under HW. (b,d) Ternary plots  
589 showing the genotype frequencies of 10 000 random SNPs on the screening array before (b)  
590 and after (d) selecting markers for the PiSy50k array. Blue and red dots are markers  
591 respectively following or deviating significantly from the HW expectations (Chi-square test at  
592 alpha level 0.001).

593 **Figure S4.** Mendelian errors (ME) of the PiSy50k identified in 40 405 SNPs genotyped in 135  
594 trios (10 crosses). (a) Distribution of ME across loci, the red line indicates the mean error rate  
595 across loci (0.29%). (b) ME across families (bars at 0 and 1 indicate the number of SNPs with  
596 no ME and with ME in only one family).

597 **Table S1.** Conversion type for markers from each data set in the screening array based on  
598 individuals with call rate 97% or above. We included the markers with the PHR and NMH  
599 conversion types (in bold) in the selection of markers for the PiSy50k array. PHR = Poly High  
600 Resolution, NMH = No Minor Homozygote, MHR = Mono High Resolution, CRBT = Call Rate  
601 Below Threshold, OTV = Off-Target Variant. Values in parenthesis are the proportion (per cent)  
602 of each conversion type in each data set.

603 **Table S2.** Number and proportions of markers from each source at different steps of the  
604 PiSy50k array design.

605 **Table S3.** Distribution of PiSy50k markers on *P. taeda* linkage groups (Westbrook *et al.*, 2015).

606 **Table S4.** Conversion type for markers from each data set in the PiSy50k array based on  
607 individuals with call rate 97% or above. We included the markers with the PHR and NMH  
608 conversion types (in bold) in further analyses. Count and proportion (%) of each conversion type

609 is given within each data set.

610 **Table S5.** Evaluation of the PiSy50k array for the control samples with call rate above 97%.

611 Values before the forward slash indicate estimates obtained from the full PiSy50k array (40 405

612 SNPs). Values after the forward slash indicate estimates obtained from the subset of SNPs and

613 the needle sample also genotyped by the Axiom\_PineGAP array (7 592 SNPs). CR: call rate;

614 Het: heterozygosity. Mean pairwise error rate estimated as percentage of calls among control

615 pairs that were different (excluding markers which had missing data in at least one of the pairs).

616 **Methods S1.** Additional steps/details in selecting markers from screening array to PiSy50k

617 array.

618 **Data S1.** The metadata for markers included on the PiSy50k array.

619 **Data S2.** Shared errors across controls identified in the error evaluation of the PiSy50k, see the

620 main text.

## 621 References

- 622 Agbor, V.B., Cicek, N., Sparling, R., Berlin, A., and Levin, D.B. (2011) *Biomass pretreatment:*  
623 *fundamentals toward application. Biotechnol. Adv.*, **29**, 675–685.
- 624 Ahtikoski, A., Ojansuu, R., Haapanen, M., Hynynen, J., and Kärkkäinen, K. (2012) *Financial*  
625 *performance of using genetically improved regeneration material of Scots pine (Pinus*  
626 *sylvestris L.) in Finland. New Forests*, **43**, 335–348.
- 627 Avia, K., Kärkkäinen, K., Lagercrantz, U., and Savolainen, O. (2014) *Association of*  
628 *FLOWERING LOCUS T/TERMINAL FLOWER 1-like gene FTL2 expression with growth*  
629 *rhythm in Scots pine (Pinus sylvestris). New Phytol.*, **204**, 159–170.
- 630 Bartholomé, J., Van Heerwaarden, J., Isik, F., Boury, C., Vidal, M., Plomion, C., and Bouffier, L.  
631 (2016) *Performance of genomic prediction within and across generations in maritime pine.*  
632 *BMC Genomics*, **17**, 604.
- 633 Bernard, A., Marrano, A., Donkpegan, A., Brown, P.J., Leslie, C.A., Neale, D.B., et al. (2020)  
634 *Association and linkage mapping to unravel genetic architecture of phenological traits and*  
635 *lateral bearing in Persian walnut (Juglans regia L.). BMC Genomics*, **21**, 203.
- 636 Bernhardsson, C., Zan, Y., Chen, Z., Ingvarsson, P.K., and Wu, H.X. (2020) *Development of a*  
637 *highly efficient 50K SNP genotyping array for the large and complex genome of Norway*  
638 *spruce (Picea abies L. Karst) by whole genome re-sequencing and its transferability to*  
639 *other spruce species. Mol. Ecol. Resour.*
- 640 Bianco, L., Cestaro, A., Linsmith, G., Muranty, H., Denancé, C., Théron, A., et al. (2016)  
641 *Development and validation of the Axiom® Apple480K SNP genotyping array. Plant J.*,  
642 **86**, 62–74.
- 643 Bouché, F., Lobet, G., Tocquin, P., and Périlleux, C. (2016) *FLOR-ID: an interactive database*  
644 *of flowering-time gene networks in Arabidopsis thaliana. Nucleic Acids Res.*, **44**, D1167–71.
- 645 Burghardt, L.T., Young, N.D., and Tiffin, P. (2017) *A Guide to Genome-Wide Association*  
646 *Mapping in Plants. Curr Protoc Plant Biol*, **2**, 22–38.
- 647 CABI (2013) *The CABI Encyclopedia of Forest Trees*. CABI.
- 648 Calleja-Rodríguez, A., Pan, J., Funda, T., Chen, Z., Baison, J., Isik, F., et al. (2020) *Evaluation*  
649 *of the efficiency of genomic versus pedigree predictions for growth and wood quality traits*  
650 *in Scots pine. BMC Genomics*, **21**, 796.
- 651 Cappa, E.P., de Lima, B.M., da Silva-Junior, O.B., Garcia, C.C., Mansfield, S.D., and  
652 Grattapaglia, D. (2019) *Improving genomic prediction of growth and wood traits in*  
653 *Eucalyptus using phenotypes from non-genotyped trees by single-step GBLUP. Plant Sci.*,  
654 **284**, 9–15.
- 655 Cervantes, S., Vuosku, J., Paczesniak, D., and Pyhäjärvi, T. *Atlas of tissue-specific and tissue-*  
656 *preferential gene expression in ecologically and economically significant conifer Pinus*  
657 *sylvestris*.
- 658 Chang, C.C., Chow, C.C., Tellier, L.C., Vattikuti, S., Purcell, S.M., and Lee, J.J. (2015) *Second-*  
659 *generation PLINK: rising to the challenge of larger and richer datasets. Gigascience*, **4**, 7.
- 660 Chen, Z.-Q., Baison, J., Pan, J., Karlsson, B., Andersson, B., Westin, J., et al. (2018) *Accuracy*  
661 *of genomic selection for growth and wood quality traits in two control-pollinated progeny*  
662 *trials using exome capture as the genotyping platform in Norway spruce. BMC Genomics*,  
663 **19**, 946.
- 664 Chevreux, B. (2007) *MIRA: an automated genome and EST assembler*.
- 665 Clark, A.G., Hubisz, M.J., Bustamante, C.D., Williamson, S.H., and Nielsen, R. (2005)  
666 *Ascertainment bias in studies of human genome-wide polymorphism. Genome Res.*, **15**,  
667 1496–1502.
- 668 Darrier, B., Russell, J., Milner, S.G., Hedley, P.E., Shaw, P.D., Macaulay, M., et al. (2019) A

- 669 *Comparison of Mainstream Genotyping Platforms for the Evaluation and Use of Barley*  
670 *Genetic Resources. Front. Plant Sci.*, **10**, 544.
- 671 Fierst, J.L. (2015) *Using linkage maps to correct and scaffold de novo genome assemblies:*  
672 *methods, challenges, and computational tools. Front. Genet.*, **6**, 220.
- 673 González-Martínez, S.C., Wheeler, N.C., Ersoz, E., Nelson, C.D., and Neale, D.B. (2007).  
674 *Association Genetics in Pinus taeda L. I. Wood Property Traits. Genetics* **175**, 399–409.
- 675 Graffelman, J. (2015) *Exploring Diallelic Genetic Markers: TheHardyWeinbergPackage. Journal*  
676 *of Statistical Software*, **64**.
- 677 Grattapaglia, D., Silva-Junior, O.B., Resende, R.T., Cappa, E.P., Müller, B.S.F., Tan, B., et al.  
678 (2018) *Quantitative Genetics and Genomics Converge to Accelerate Forest Tree Breeding.*  
679 *Front. Plant Sci.*, **9**, 1693.
- 680 Grivet, D., Avia, K., Vaattovaara, A., Eckert, A.J., Neale, D.B., Savolainen, O., and González-  
681 Martínez, S.C. (2017) *High rate of adaptive evolution in two widespread European pines.*  
682 *Mol. Ecol.*, **26**, 6857–6870.
- 683 Haapanen M., Jansson G., Nielsen U.B., Steffenrem A., Stener L.G. (2015). *The status of tree*  
684 *breeding and its potential for improving biomass production – a review of breeding activities*  
685 *and genetic gains in Scandinavia and Finland. Skogforsk, Uppsala. 56 p.*  
686 [http://www.skogforsk.se/contentassets/9d9c6eeaf374a2283b2716edd8d552e/the-status-](http://www.skogforsk.se/contentassets/9d9c6eeaf374a2283b2716edd8d552e/the-status-of-tree-breeding-low.pdf)  
687 [of-tree-breeding-low.pdf](http://www.skogforsk.se/contentassets/9d9c6eeaf374a2283b2716edd8d552e/the-status-of-tree-breeding-low.pdf).
- 688 Haapanen, M., Hynynen, J., Ruotsalainen, S., Siipilehto, J., and Kilpeläinen, M.-L. (2016)  
689 *Realised and projected gains in growth, quality and simulated yield of genetically improved*  
690 *Scots pine in southern Finland. European Journal of Forest Research*, **135**, 997–1009.
- 691 Houston Durrant, T., De Rigo, D., and Caudullo, G. (2016) *Pinus sylvestris in Europe:*  
692 *distribution, habitat, usage and threats. European Atlas of Forest Tree Species.*  
693 *Luxembourg: Publications Office of the European Union, e016b94.*
- 694 Huang, X. and Madan, A. (1999) *CAP3: A DNA sequence assembly program. Genome Res.*, **9**,  
695 868–877.
- 696 Isik (2014) *Genomic selection in forest tree breeding: the concept and an outlook to the future.*  
697 *New Forests*, **45**, 379–401.
- 698 Jansson, G., Hansen, J.K., Haapanen, M., Kvaalen, H., and Steffenrem, A. (2017) *The genetic*  
699 *and economic gains from forest tree breeding programmes in Scandinavia and Finland.*  
700 *Scand. J. For. Res.*, **32**, 273–286.
- 701 Kujala, S.T. and Savolainen, O. (2012) *Sequence variation patterns along a latitudinal cline in*  
702 *Scots pine (Pinus sylvestris): signs of clinal adaptation? Tree Genet. Genomes*, **8**, 1451–  
703 1467.
- 704 Kujala, S.T., Knürr, T., Kärkkäinen, K., Neale, D.B., Sillanpää, M.J., and Savolainen, O. (2017)  
705 *Genetic heterogeneity underlying variation in a locally adaptive clinal trait in Pinus*  
706 *sylvestris revealed by a Bayesian multipopulation analysis. Heredity*, **118**, 413–423.
- 707 Lande, R. and Thompson, R. (1990) *Efficiency of marker-assisted selection in the improvement*  
708 *of quantitative traits. Genetics*, **124**, 743–756.
- 709 Lenz, P.R.N., Beaulieu, J., Mansfield, S.D., Clément, S., Despons, M., and Bousquet, J. (2017)  
710 *Factors affecting the accuracy of genomic selection for growth and wood quality traits in an*  
711 *advanced-breeding population of black spruce (Picea mariana). BMC Genomics*, **18**.
- 712 Lee, S.J. (2002). *Selection of parents for the Scots pine breeding population in Britain. Forestry:*  
713 *An International Journal of Forest Research*, **75**, 293–303.
- 714 Li, H., Handsaker, B., Wysoker, A., Fennell, T., Ruan, J., Homer, N., Marth, G., Abecasis, G.,  
715 Durbin, R., and 1000 Genome Project Data Processing Subgroup (2009). *The Sequence*  
716 *Alignment/Map format and SAMtools. Bioinformatics*. **25**, 2078–2079.
- 717 Li, H. (2013) *Aligning sequence reads, clone sequences and assembly contigs with BWA-MEM.*  
718 *arXiv [q-bio.GN]*.
- 719 Lim, K.-J., Paasela, T., Harju, A., Venäläinen, M., Paulin, L., Auvinen, P., et al. (2016)

- 720 *Developmental Changes in Scots Pine Transcriptome during Heartwood Formation. Plant*  
721 *Physiol.*, **172**, 1403–1417.
- 722 Manichaikul, A., Mychaleckyj, J.C., Rich, S.S., Daly, K., Sale, M., and Chen, W.-M. (2010)  
723 *Robust relationship inference in genome-wide association studies. Bioinformatics*, **26**,  
724 2867–2873.
- 725 Marrano, A., Martínez-García, P.J., Bianco, L., Sideli, G.M., Di Pierro, E.A., Leslie, C.A., et al.  
726 (2019) *A new genomic tool for walnut (Juglans regia L.): development and validation of the*  
727 *high-density Axiom™ J. regia 700K SNP genotyping array. Plant Biotechnol. J.*, **17**, 1027–  
728 1036.
- 729 Mason, W.L., and Alía, R. (2000). Current and future status of Scots Pine (*Pinus sylvestris* L.)  
730 forests in Europe. *Forest Systems* 9(1), pp.317-335.
- 731 McTavish, E.J. and Hillis, D.M. (2015) *How do SNP ascertainment schemes and population*  
732 *demographics affect inferences about population history? BMC Genomics*, **16**, 266.
- 733 Meuwissen, T., Hayes, B., and Goddard, M. (2016) *Genomic selection: A paradigm shift in*  
734 *animal breeding. Anim Fron*, **6**, 6–14.
- 735 Meuwissen, T.H., Hayes, B.J., and Goddard, M.E. (2001) *Prediction of total genetic value using*  
736 *genome-wide dense marker maps. Genetics*, **157**, 1819–1829.
- 737 Mullin, T.J., Andersson, B., Bastien, J.-C., Beaulieu, J., Burdon, R., Dvorak, W., King, J., Kondo,  
738 T., Krakowski, J., Lee, S., et al. (2011). *Economic importance, breeding objectives and*  
739 *achievements. Genetics, Genomics and Breeding of Conifers*, 40–127.
- 740 Neale, D.B., and Savolainen, O. (2004). *Association genetics of complex traits in conifers.*  
741 *Trends in Plant Science*. **9**, 325–330.
- 742 Neale, D.B., Wegrzyn, J.L., Stevens, K.A., Zimin, A.V., Puiu, D., Crepeau, M.W., et al. (2014)  
743 *Decoding the massive genome of loblolly pine using haploid DNA and novel assembly*  
744 *strategies. Genome Biol.*, **15**, R59.
- 745 Nikkanen, T., Karvinen, K., Koski, V., Rusanen, M., and Yrjänä-Ketola, L. (1999) *Kuusen ja*  
746 *männyn siemenviljelykset ja niiden käyttöalueet. Metsäntutkimuslaitos.*
- 747 Ojeda, D.I., Mattila, T.M., Ruttink, T., Kujala, S.T., Kärkkäinen, K., Verta, J.-P., and Pyhäjärvi, T.  
748 (2019) *Utilization of Tissue Ploidy Level Variation in de Novo Transcriptome Assembly of*  
749 *Pinus sylvestris. G3*, **9**, 3409–3421.
- 750 Oróstica, K.Y. and Verdugo, R.A. (2016) *chromPlot: visualization of genomic data in*  
751 *chromosomal context. Bioinformatics*, **32**, 2366–2368.
- 752 Palmé, A.E., Wright, M., and Savolainen, O. (2008) *Patterns of divergence among conifer ESTs*  
753 *and polymorphism in Pinus sylvestris identify putative selective sweeps. Mol. Biol. Evol.*,  
754 **25**, 2567–2577.
- 755 Pan, Y., Birdsey, R.A., Fang, J., Houghton, R., Kauppi, P.E., Kurz, W.A., et al. (2011) *A large*  
756 *and persistent carbon sink in the world's forests. Science*, **333**, 988–993.
- 757 Pavan, S., Delvento, C., Ricciardi, L., Lotti, C., Ciani, E., and D'Agostino, N. (2020)  
758 *Recommendations for Choosing the Genotyping Method and Best Practices for Quality*  
759 *Control in Crop Genome-Wide Association Studies. Front. Genet.*, **11**, 447.
- 760 Perry, A., Wachowiak, W., Downing, A., Talbot, R., and Cavers, S. (2020) *Development of a*  
761 *SNP array for population genomic studies in four European pine species. Mol. Ecol.*  
762 *Resour.*
- 763 Privé, F., Luu, K., Vilhjálmsson, B.J., and Blum, M.G.B. (2020) *Performing Highly Efficient*  
764 *Genome Scans for Local Adaptation with R Package pcadapt Version 4. Mol. Biol. Evol.*,  
765 **37**, 2153–2154.
- 766 Purcell, S., Neale, B., Todd-Brown, K., Thomas, L., Ferreira, M.A.R., Bender, D., et al. (2007)  
767 *PLINK: a tool set for whole-genome association and population-based linkage analyses.*  
768 *Am. J. Hum. Genet.*, **81**, 559–575.
- 769 Pyhäjärvi, T., García-Gil, M.R., Knürr, T., Mikkonen, M., Wachowiak, W., and Savolainen, O.  
770 (2007) *Demographic history has influenced nucleotide diversity in European Pinus*



- 771 *sylvestris* populations. *Genetics*, **177**, 1713–1724.
- 772 Pyhäjärvi, T., Kujala, S.T., and Savolainen, O. (2020) 275 years of forestry meets genomics in  
773 *Pinus sylvestris*. *Evol. Appl.*, **13**, 11–30.
- 774 Resende, M.F.R., Muñoz, P., Resende, M.D.V., Garrick, D.J., Fernando, R.L., Davis, J.M.,  
775 Jokela, E.J., Martin, T.A., Peter, G.F., and Kirst, M. (2012). Accuracy of Genomic Selection  
776 Methods in a Standard Data Set of Loblolly Pine (*Pinus taeda* L.). *Genetics*, **190**, 1503–  
777 1510.
- 778 Rosvall O, Jansson G, Andersson B, Ericsson T, Karlsson B, Sonesson J, Stener L (2001)  
779 Genetiska vinster i nuvarande och framtida fröplantager och klonblandningar [Summary:  
780 Genetic gains from present and future seed orchards and clone mixes]. Redogörelse nr 1,  
781 Skogforsk: 1–41.
- 782 Rusanen, A., Lappalainen, K., Kärkkäinen, J., Tuuttila, T., Mikola, M., and Lassi, U. (2019)  
783 Selective hemicellulose hydrolysis of Scots pine sawdust. *Biomass Conversion and*  
784 *Biorefinery*, **9**, 283–291.
- 785 Sarvas, R. (1964): Havupuut. WSOY, Porvoo–Helsinki. 518 p. (In Finnish)
- 786 Saunders, I.W., Brohede, J., and Hannan, G.N. (2007) Estimating genotyping error rates from  
787 Mendelian errors in SNP array genotypes and their impact on inference. *Genomics*, **90**,  
788 291–296.
- 789 Silva-Junior, O.B., Faria, D.A., and Grattapaglia, D. (2015) A flexible multi-species genome-  
790 wide 60K SNP chip developed from pooled resequencing of 240 *Eucalyptus* tree genomes  
791 across 12 species. *New Phytol.*, **206**, 1527–1540.
- 792 Silva-Junior, O.B. and Grattapaglia, D. (2015) Genome-wide patterns of recombination, linkage  
793 disequilibrium and nucleotide diversity from pooled resequencing and single nucleotide  
794 polymorphism genotyping unlock the evolutionary history of *Eucalyptus grandis*. *New*  
795 *Phytol.*, **208**, 830–845.
- 796 Stevens, K.A., Wegrzyn, J.L., Zimin, A., Puiu, D., Crepeau, M., Cardeno, C., et al. (2016)  
797 Sequence of the Sugar Pine Megagenome. *Genetics*, **204**, 1613–1626.
- 798 Tajima, F. (1989) Statistical method for testing the neutral mutation hypothesis by DNA  
799 polymorphism. *Genetics*, **123**, 585–595.
- 800 Tam, V., Patel, N., Turcotte, M., Bossé, Y., Paré, G., and Meyre, D. (2019) Benefits and  
801 limitations of genome-wide association studies. *Nat. Rev. Genet.*, **20**, 467–484.
- 802 Tan, B., Grattapaglia, D., Martins, G.S., Ferreira, K.Z., Sundberg, B., and Ingvarsson, P.K.  
803 (2017) Evaluating the accuracy of genomic prediction of growth and wood traits in two  
804 *Eucalyptus* species and their F1 hybrids. *BMC Plant Biol.*, **17**, 110.
- 805 R Core Team (2018). R: A language and environment for statistical computing. R Foundation for  
806 Statistical Computing, Vienna, Austria.
- 807 Thistlethwaite, F.R., El-Dien, O.G., Ratcliffe, B., Klápště, J., Porth, I., Chen, C., Stoehr, M.U.,  
808 Ingvarsson, P.K., and El-Kassaby, Y.A. (2020). Linkage disequilibrium vs. pedigree:  
809 Genomic selection prediction accuracy in conifer species. *PLOS ONE*, **15**, e0232201.
- 810 Tyrmi, J.S., Vuosku, J., Acosta, J.J., Li, Z., Sterck, L., Cervera, M.T., et al. (2020) Genomics of  
811 Clinal Local Adaptation in *Pinus sylvestris* Under Continuous Environmental and Spatial  
812 Genetic Setting. *G3: Genes|Genomes|Genetics*, **10**, 2683–2696.
- 813 Voss-Fels, K.P., Cooper, M., and Hayes, B.J. (2019) Accelerating crop genetic gains with  
814 genomic selection. *Theor. Appl. Genet.*, **132**, 669–686.
- 815 Vuosku, J., Karppinen, K., Muilu-Mäkelä, R., Kusano, T., Sagor, G.H.M., Avia, K., et al. (2018)  
816 Scots pine aminopropyltransferases shed new light on evolution of the polyamine  
817 biosynthesis pathway in seed plants. *Ann. Bot.*, **121**, 1243–1256.
- 818 Vuosku, J., Muilu-Mäkelä, R., Avia, K., Suokas, M., Kestilä, J., Läärä, E., et al. (2019)  
819 Thermospermine Synthase (*ACL5*) and Diamine Oxidase (*DAO*) Expression Is Needed for  
820 Zygotic Embryogenesis and Vascular Development in Scots Pine. *Front. Plant Sci.*, **10**,  
821 1600.

- 822 Wachowiak, W., Balk, P.A., and Savolainen, O. (2009) *Search for nucleotide diversity patterns*  
823 *of local adaptation in dehydrins and other cold-related candidate genes in Scots pine*  
824 *(Pinus sylvestris L.). Tree Genet. Genomes, 5, 117.*
- 825 Wachowiak, W., Trivedi, U., Perry, A., and Cavers, S. (2015) *Comparative transcriptomics of a*  
826 *complex of four European pine species. BMC Genomics, 16, 234.*
- 827 Wegrzyn, J.L., Lee, J.M., Tearse, B.R., and Neale, D.B. (2008) *TreeGenes: A forest tree*  
828 *genome database. Int. J. Plant Genomics, 2008, 412875.*
- 829 Westbrook, J.W., Chhatre, V.E., Wu, L.-S., Chamala, S., Neves, L.G., Muñoz, P., et al. (2015) *A*  
830 *Consensus Genetic Map for Pinus taeda and Pinus elliottii and Extent of Linkage*  
831 *Disequilibrium in Two Genotype-Phenotype Discovery Populations of Pinus taeda. G3, 5,*  
832 *1685–1694.*
- 833 Wray, N.R., Kemper, K.E., Hayes, B.J., Goddard, M.E., and Visscher, P.M. (2019) *Complex*  
834 *Trait Prediction from Genome Data: Contrasting EBV in Livestock to PRS in Humans:*  
835 *Genomic Prediction. Genetics, 211, 1131–1141.*
- 836 Yang, J., Benyamin, B., McEvoy, B.P., Gordon, S., Henders, A.K., Nyholt, D.R., et al. (2010)  
837 *Common SNPs explain a large proportion of the heritability for human height. Nat. Genet.,*  
838 *42, 565–569.*
- 839 Yeaman, S., Hodgins, K.A., Lotterhos, K.E., Suren, H., Nadeau, S., Degner, J.C., Nurkowski,  
840 K.A., Smets, P., Wang, T., Gray, L.K., et al. (2016). *Convergent local adaptation to climate*  
841 *in distantly related conifers. Science, 353, 1431–1433.*
- 842 Zimin, A., Stevens, K.A., Crepeau, M.W., Holtz-Morris, A., Koriabine, M., Marçais, G., et al.  
843 *(2014) Sequencing and assembly of the 22-gb loblolly pine genome. Genetics, 196, 875–*  
844 *890.*

## 845 Tables

846 **Table 1.** Sources of SNPs used in the design of PiSy50k array (M = megagametophyte, N =  
847 needle, E = embryo; ISS Punkaharju = Intensive Study Site Punkaharju in southeast Finland).

| Data ID               | Source tissue | Ascertainment size | Sampling area  | DNA/RNA | Method                                                          | Reference                                                                                                                                                                                                                                                                                                                                                                                                |
|-----------------------|---------------|--------------------|----------------|---------|-----------------------------------------------------------------|----------------------------------------------------------------------------------------------------------------------------------------------------------------------------------------------------------------------------------------------------------------------------------------------------------------------------------------------------------------------------------------------------------|
| a. ProCoGen haploid   | M             | 109 haploids       | Europe         | DNA     | Exome capture, Illumina                                         | Tyrmi <i>et al.</i> , 2020                                                                                                                                                                                                                                                                                                                                                                               |
| b. ProCoGen diploid   | N             | 68 diploids        | Europe         | DNA     | Exome capture, Illumina                                         | Kastally <i>et al.</i> In prep.                                                                                                                                                                                                                                                                                                                                                                          |
| c. UOULU exomeFEB2019 | NEM           | 2 diploids         | ISS Punkaharju | DNA     | Exome capture, Illumina                                         | Kesälähti <i>et al.</i> In prep.                                                                                                                                                                                                                                                                                                                                                                         |
| d. UOULU RNA-seq      | NEM           | 18 lineages        | ISS Punkaharju | RNA     | Transcriptome                                                   | Ojeda <i>et al.</i> , 2019                                                                                                                                                                                                                                                                                                                                                                               |
| e. UKCEH1†            | N             | 17 diploids        | Europe         | RNA     | SNP array<br>Axiom_PineGAP (best set)                           | Perry <i>et al.</i> , 2020                                                                                                                                                                                                                                                                                                                                                                               |
| f. UKCEH2             | N             | 17 diploids        | Europe         | RNA     | SNP array<br>Axiom_PineGAP;<br>Transcriptomes of 4 Pine species | Perry <i>et al.</i> , 2020;<br>Wachowiak <i>et al.</i> , 2015                                                                                                                                                                                                                                                                                                                                            |
| g. UOULU candidate†   | M             | 12-119 haploids    | Europe         | DNA     | Sanger sequencing,<br>Illumina sequencing                       | Avia <i>et al.</i> , 2014;<br>Grivet <i>et al.</i> , 2017;<br>Kujala &<br>Savolainen 2012;<br>Kujala <i>et al.</i> , 2017;<br>Palmé <i>et al.</i> , 2008;<br>Pyhäjärvi <i>et al.</i> ,<br>2007; Vuosku <i>et al.</i> ,<br>2018, 2019;<br>Wachowiak <i>et al.</i> ,<br>2009; Wegrzyn <i>et al.</i> ,<br>2008, Evoltree<br>EST database<br>( <a href="http://www.evoltree.eu">http://www.evoltree.eu</a> ) |
| h. LUKE candidate†    | M             | 2-102 haploids     | Europe         | DNA     | Sequence capture,<br>Pacific Bioscience,<br>Illumina            | Kujala <i>et al.</i> In<br>prep, Tyrmi <i>et al.</i> ,<br>2020                                                                                                                                                                                                                                                                                                                                           |

848 †High priority sources, favored during the array design.

## Figures

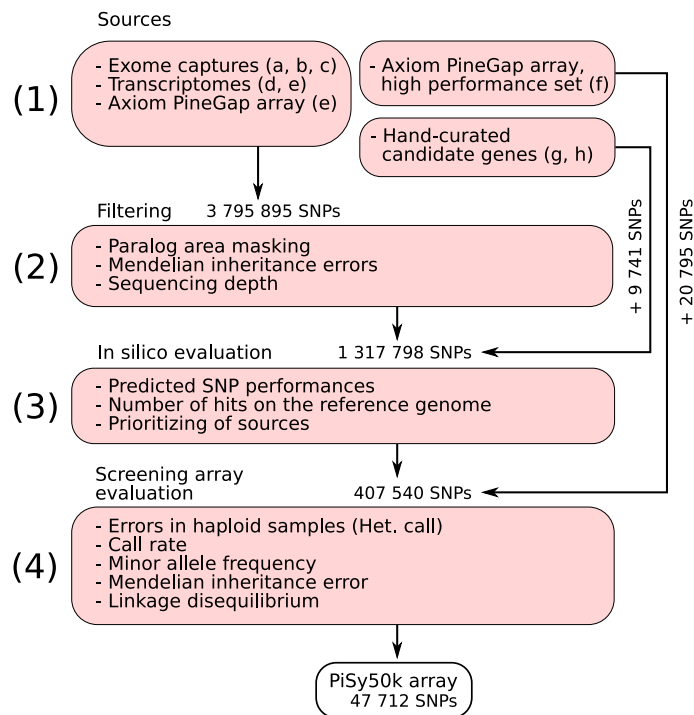

**Figure 1.** Flow chart of the PiSy50k array design. We proceeded in four steps: (1) the collection of SNPs from 8 sources (Table 1; a: ProCoGen Haploid, b: ProCoGen Diploid, c: UOULU exomeFEB2019, d: UOULU RNA-seq, e: UKCEH2, f: UKCEH1, g: UOULU candidate and h: LUKE PacBio); (2) filtering to remove SNPs from paralogous genomic areas, SNPs with low sequencing depth or Mendelian errors; (3) evaluation to retain the best set of 407 540 markers (screening set) and (4) filtering based on the screening array performance to select the 47 712 markers retained in the PiSy50k array.

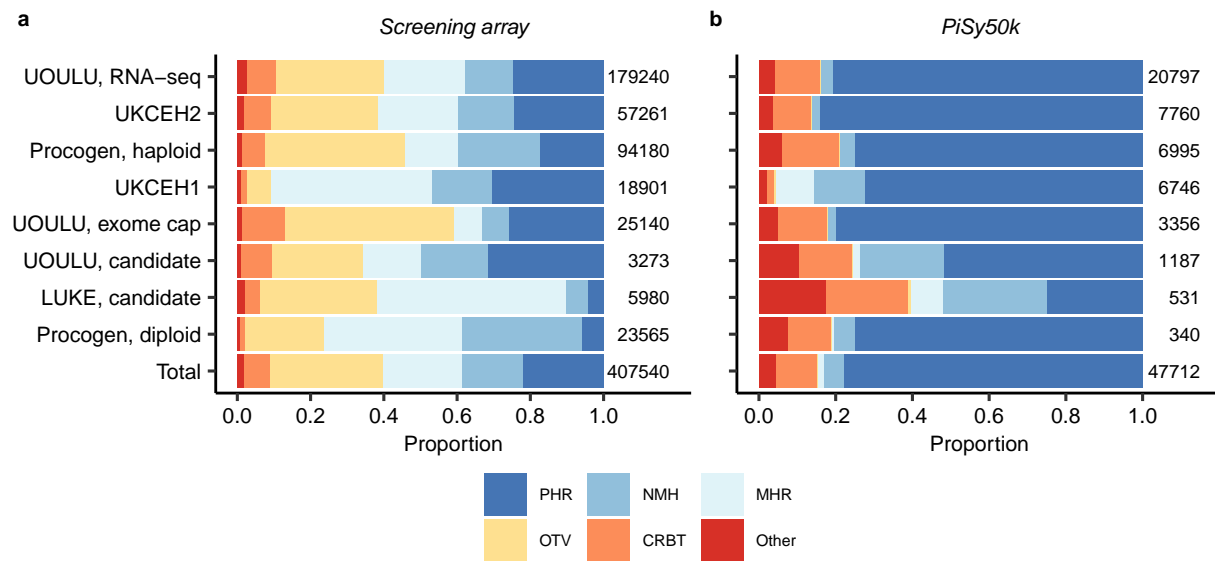

**Figure 2.** The proportions of conversion types of each marker source in (a) the screening array and (b) the PiSy50k array. PHR = Poly High Resolution, NMH = No Minor Homozygote, MHR = Mono High Resolution, CRBT = Call Rate Below Threshold, OTV = Off-Target Variant. Number right to the bar indicates the total number of SNPs per marker source.

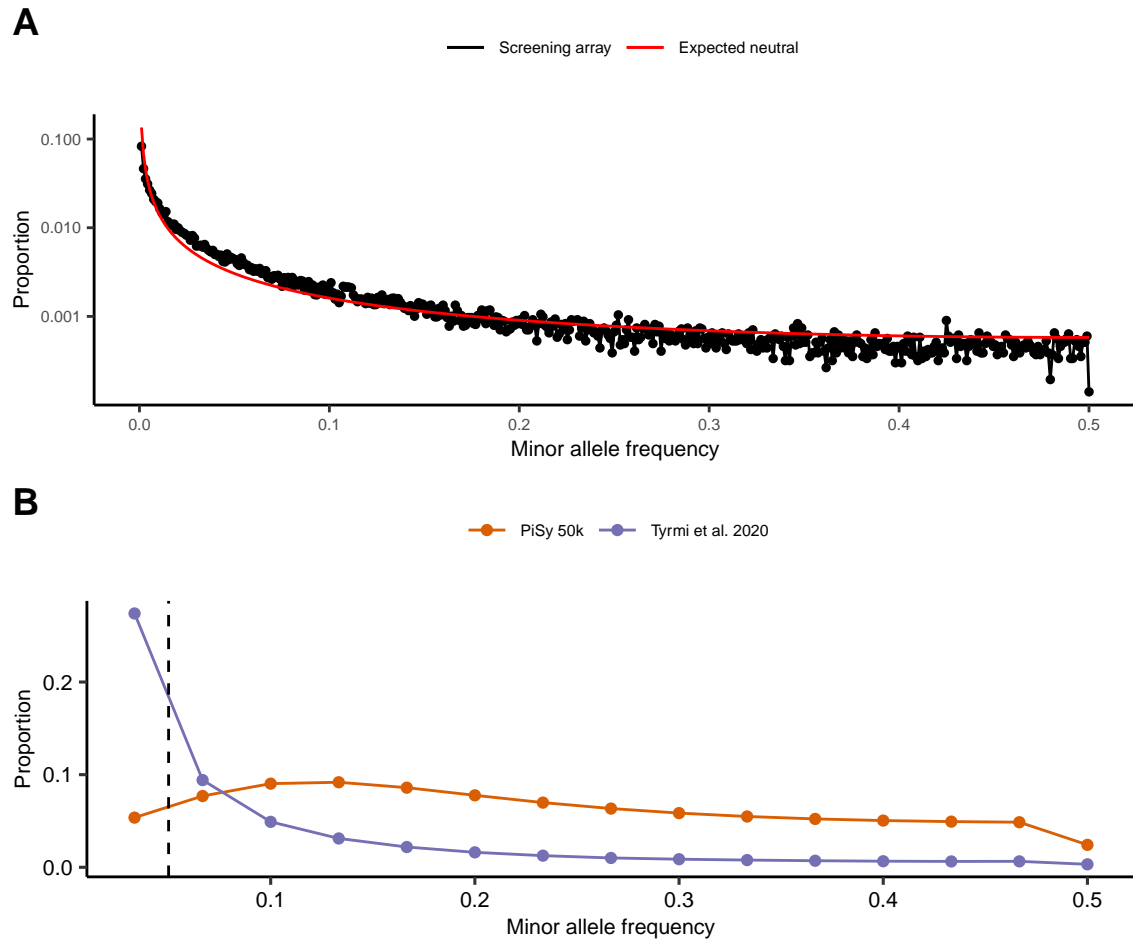

**Figure 3.** Minor allele frequency (MAF) spectra of the screening and PiSy50k arrays. (A) MAF for the screening population sample ( $N = 466$ ) and 56 693 SNPs (conversion type PHR and NMR) without missing data in the screening array. The red line illustrates the expected neutral MAF (Tajima, 1989). Note the log scale on the y-axis. (B) MAF based on the PiSy50k array including 38 302 SNPs genotyped in 90 plus-trees across three Finnish breeding populations (red line) and 42 exome captures of Scots pine trees sampled in four natural populations of Finland (Tyrmi et al., 2020). To be comparable, we downsampled both distributions to 30 samples. The vertical dashed line marks the filter threshold of 0.05 used during the array design and below which SNPs were partly excluded. As expected, there is a deficiency of rare alleles in the data obtained from the PiSy50k, as a result of ascertainment bias.

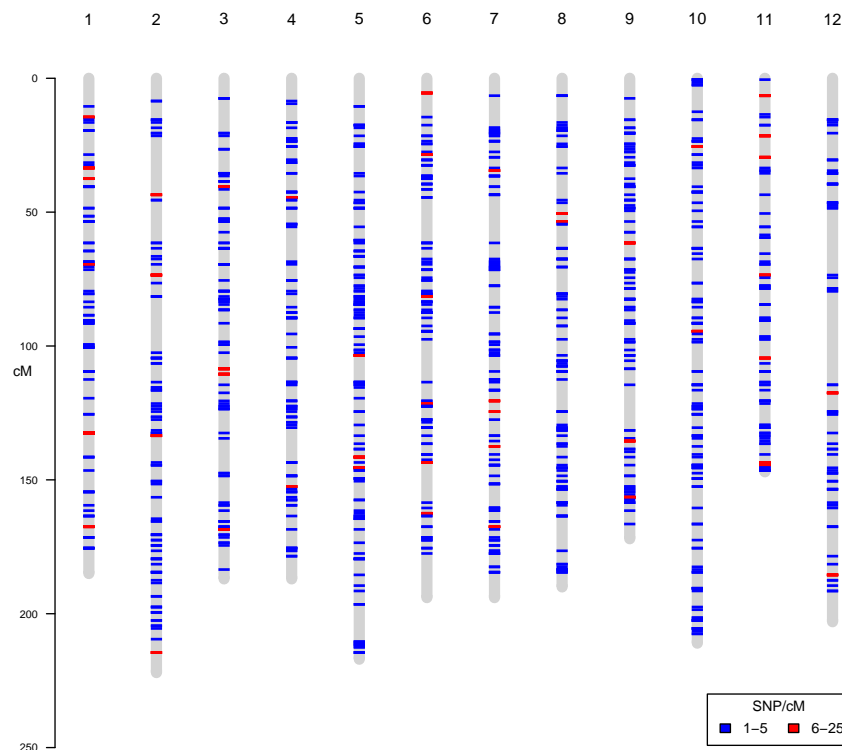

**Figure 4.** Position and density of 1 619 SNPs from the PiSy50k array on the *P. taeda* linkage map (Westbrook et al., 2015). The vertical grey lines represent the 12 linkage groups in *P. taeda*, while horizontal colored lines indicate the marker positions and density. This plot was made with the R package chromPlot (v 1.12.0) (Oróstica and Verdugo, 2016).

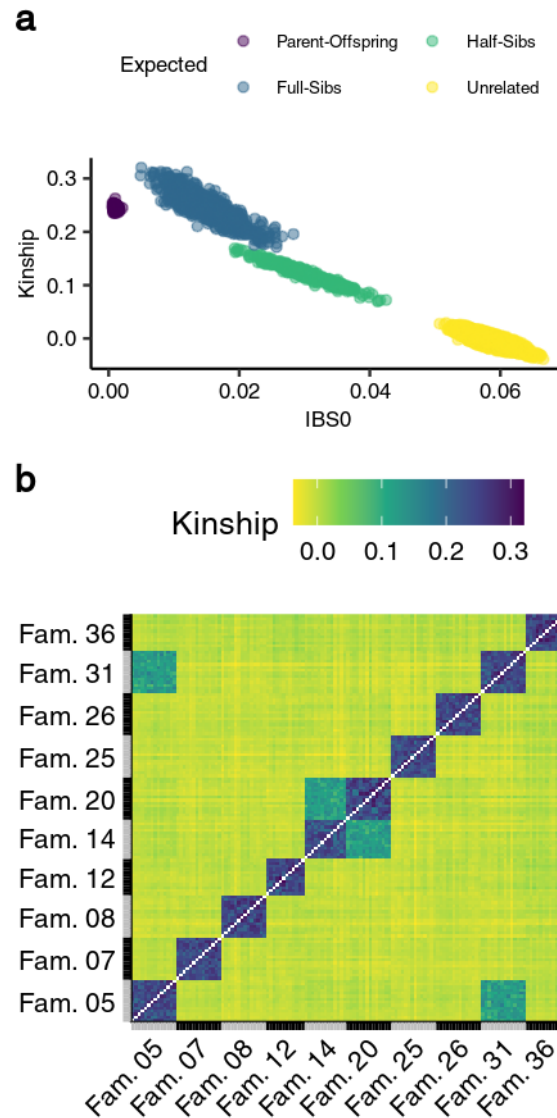

**Figure 5.** Relatedness analyses of 10 families (including 18 parents and 135 offspring) using the PiSy50k array. (a) Kinship coefficients (Manichaikul et al., 2010) and proportion of sites where individuals share no allele (IBS0) between all pairs and using 39 678 SNPs (PHR + NMH). Expected relationships between pairs are outlined: parent-offspring in purple, full sibs in blue, half sibs in green, and unrelated pairs in yellow. (b) Heat map of the kinship coefficients between all pairs of the 135 offspring.



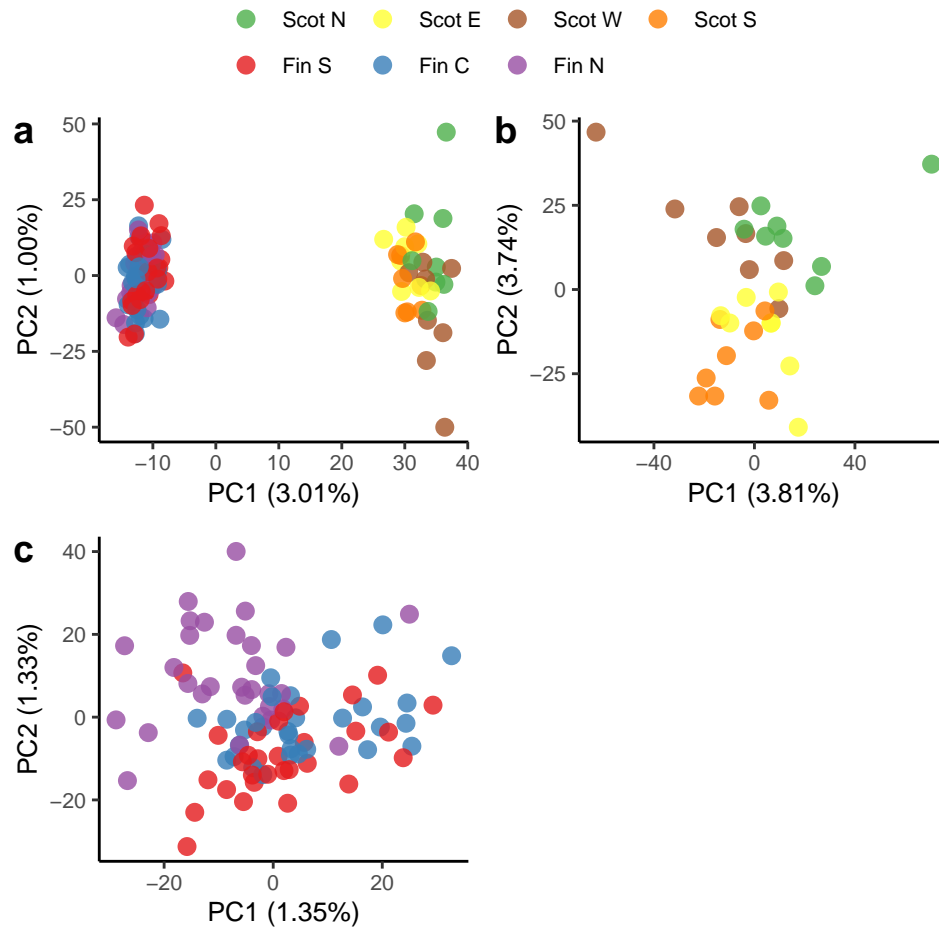

**Figure 6.** Principal Component Analysis (PCA) using 39 678 polymorphic SNPs from the PiSy50k array genotyped in 120 trees from seven areas in Finland (90) and Scotland (30). PCA including (a) all 120 samples from Finland and Scotland, (b) 30 samples collected across 21 localities grouped in four geographical areas of Scotland, or (c) 90 samples from Southern, Central and Northern Finland (30 samples each). Scot N, E, W and S: Northern, Eastern, Western and Southern Scotland. Fin S, C and N: Southern, Central and Northern Finland.
